# Supplementary material for: Hospital admissions from care homes in England during the COVID-19 pandemic: a retrospective, cross-sectional analysis using linked administrative data
Source: PubMed Central journal article supplement — Int J Popul Data Sci. 2021 Jul 8;5(4):1663. doi: 10.23889/ijpds.v5i4.1663 (PMC8267611; doi:10.23889/ijpds.v5i4.1663), 2021-07-08

Appendix Figure S1: Data cleaning workflow to create cohorts of care home residents in January 2019 and January 2020

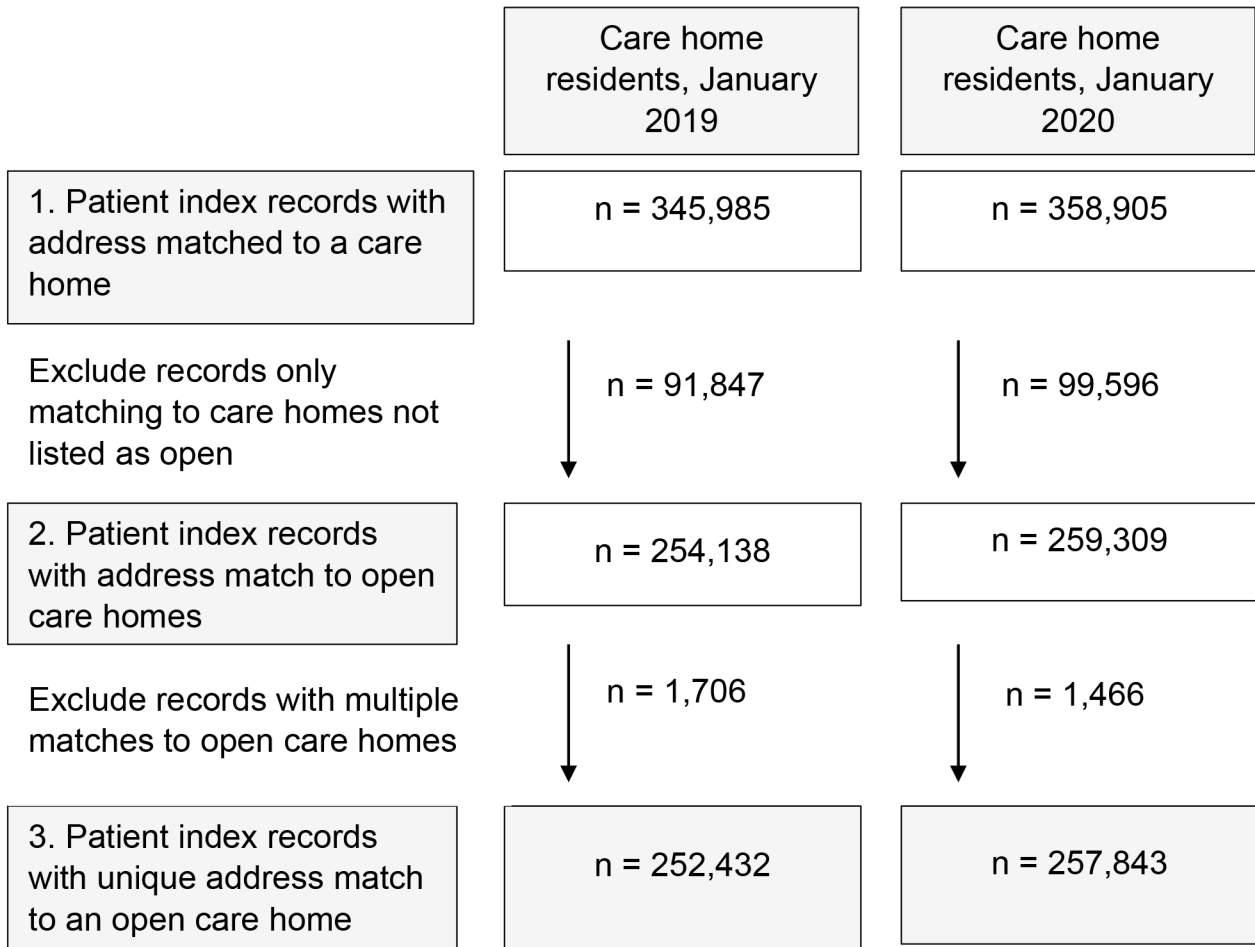

Appendix Figure S2: Assessment of similarity between cohorts of care home residents in January 2019 and January 2020

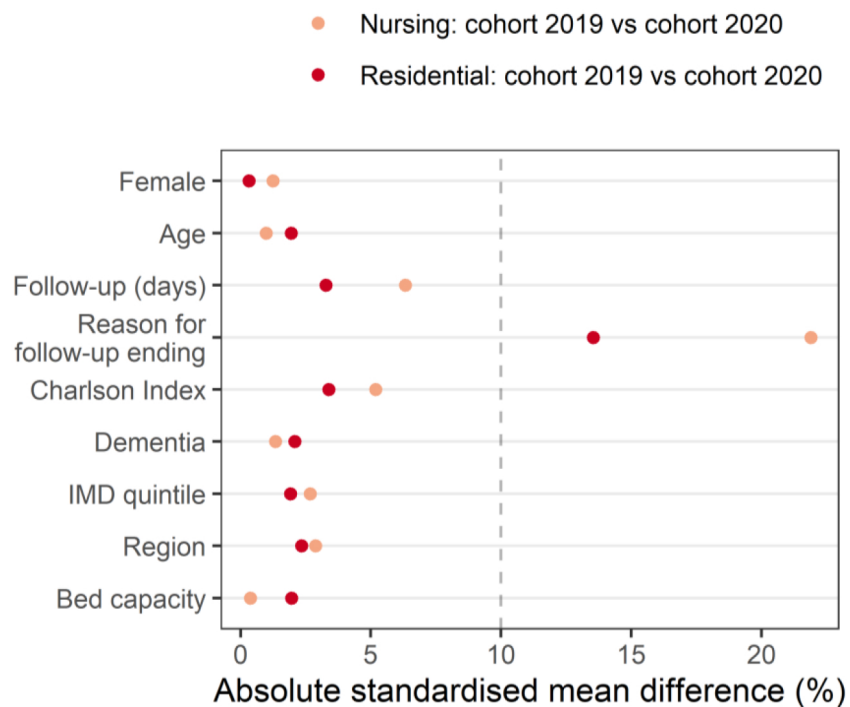

Appendix Figure S3: Number and percentage of COVID-19 hospital admissions between 1 March and 31 May 2020, by number of additional diagnoses codes and care home type

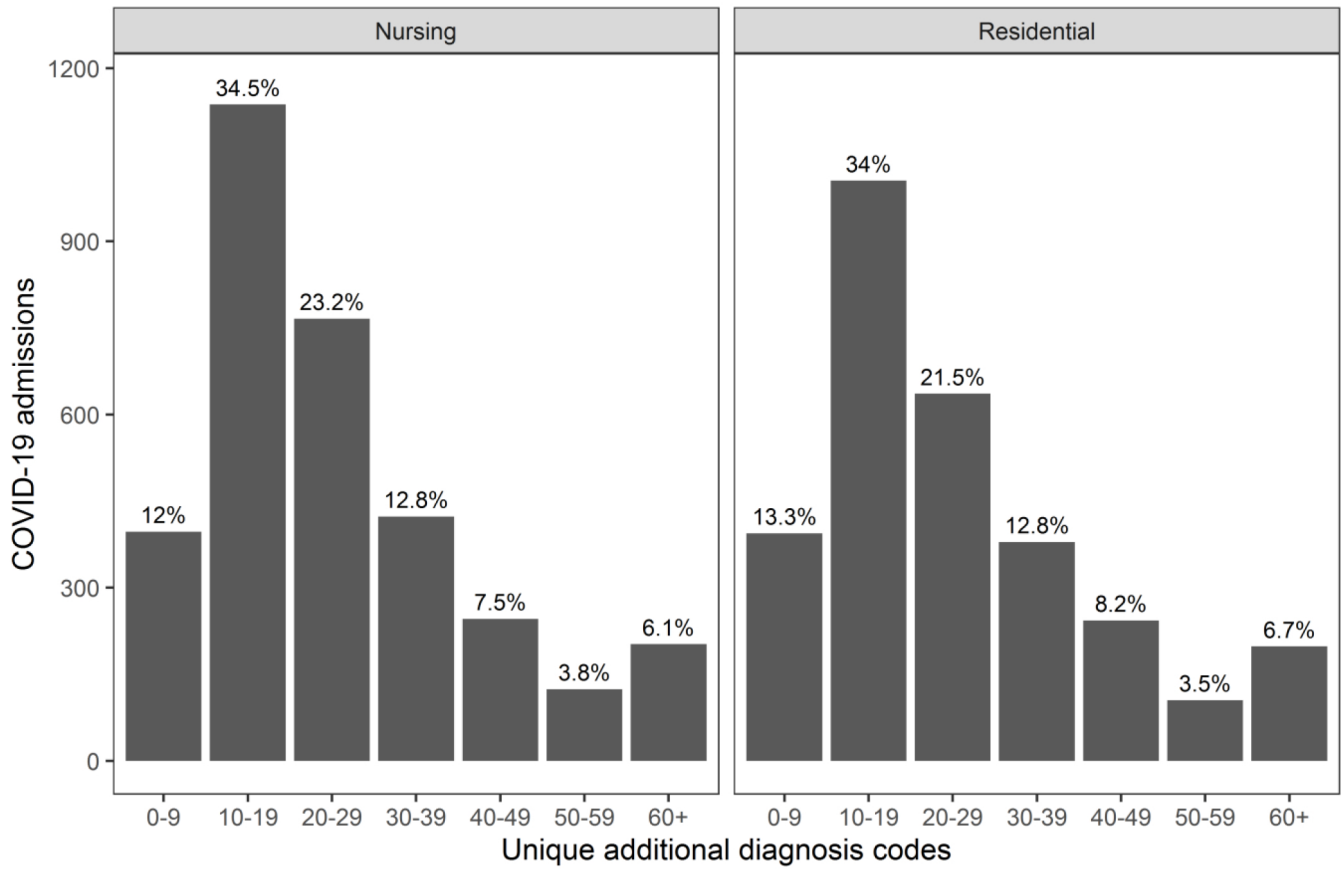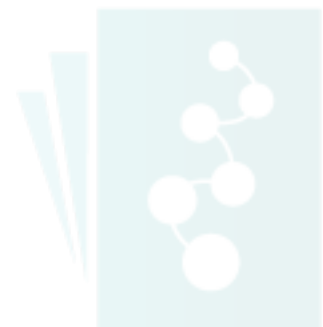

Appendix Figure S4: Number and percentage of COVID-19 hospital admissions with additional diagnosis codes in other ICD-10 chapters (1 March to 31 May 2020), by care home type

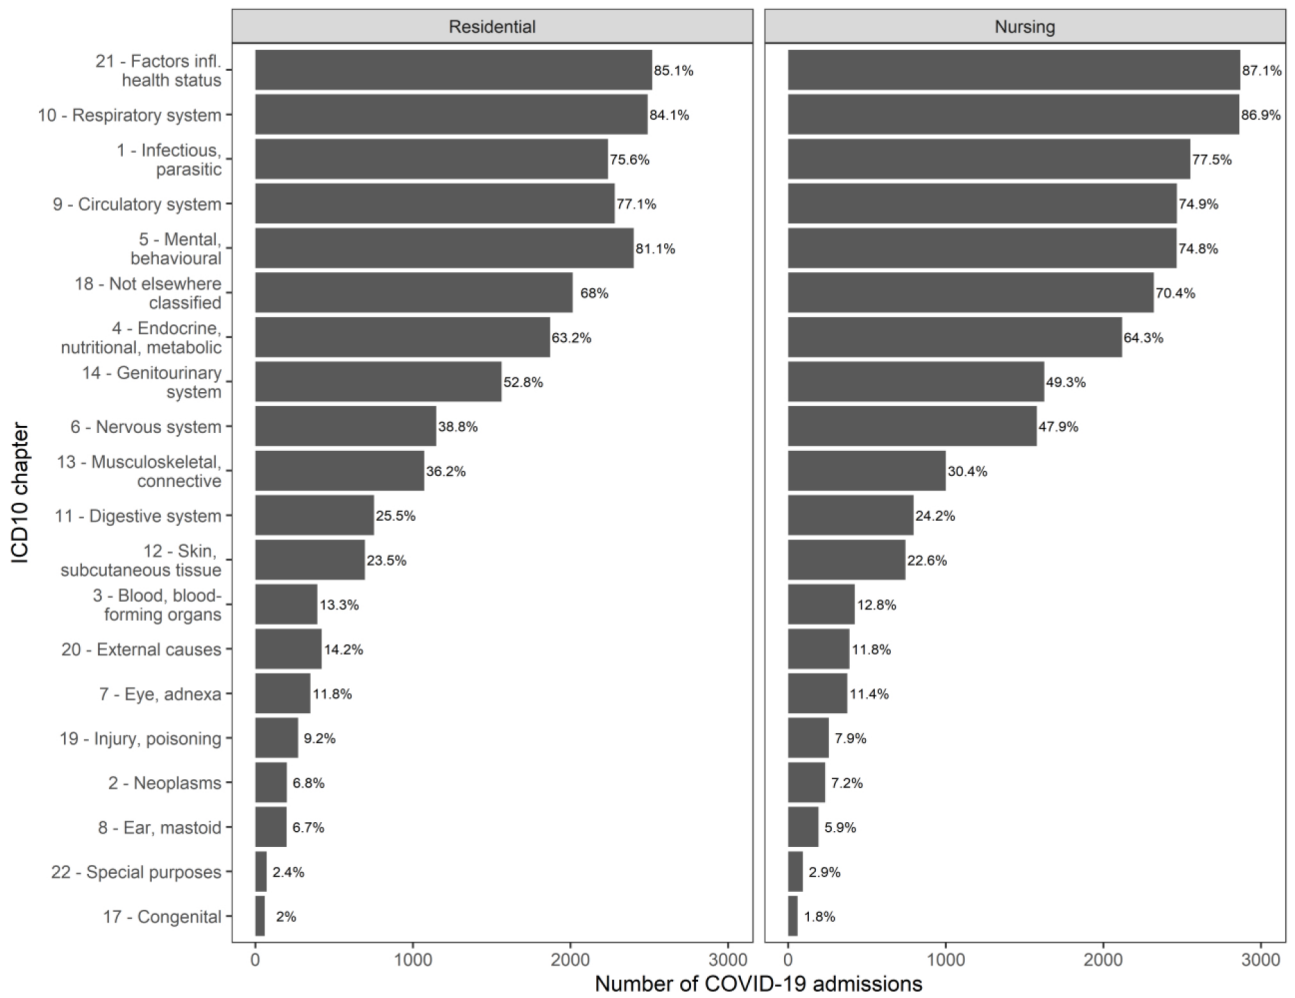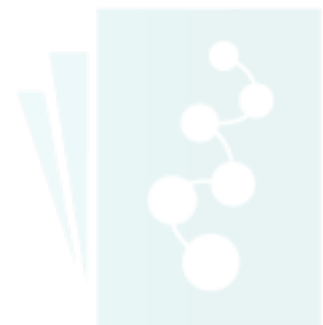

Appendix Figure S5: Assessment of similarity of the characteristics between care home residents admitted to National Health Service hospital trusts in England for suspected or confirmed COVID-19 or for other primary diagnoses, by care home type (1 March to 31 May 2019, and 1 March to 31 May 2020)

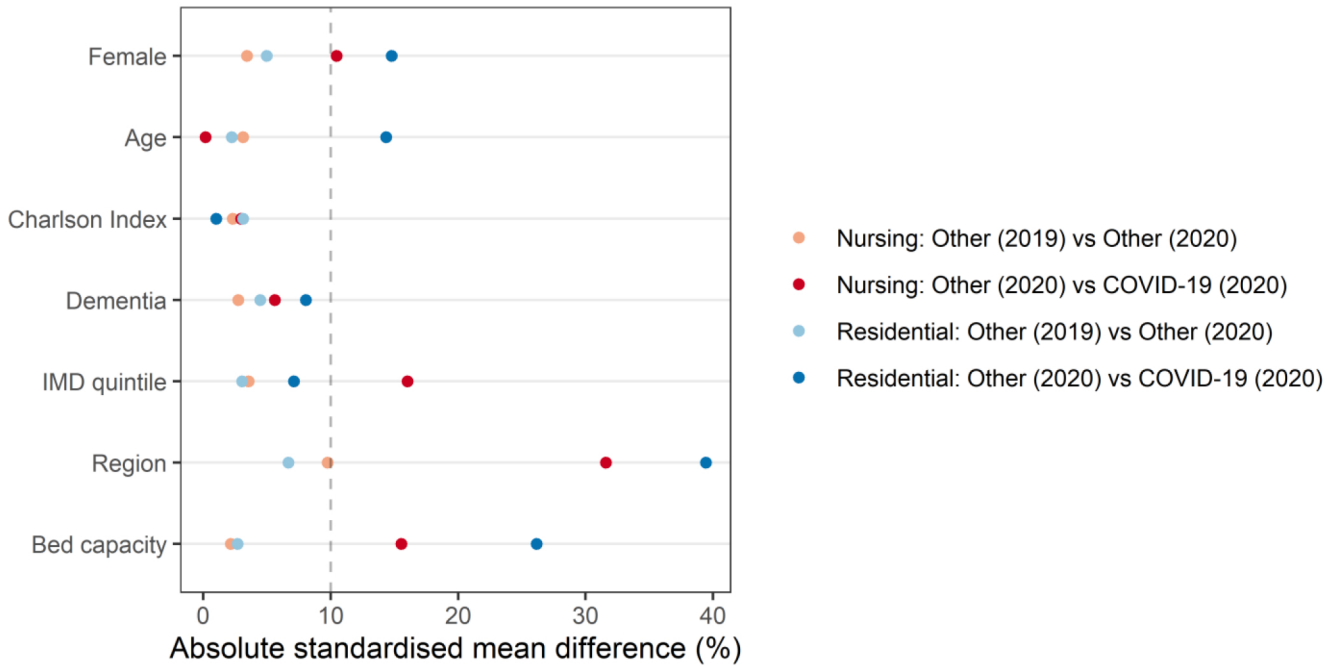

Includes ordinary elective admissions, elective day cases and emergency admission.

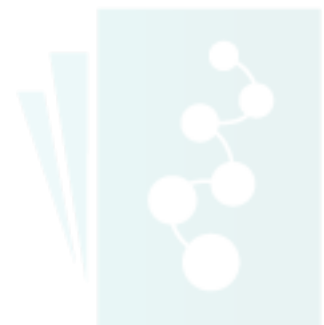

Appendix Table S1: ICD-10 chapters, diagnosis code ranges and chapter descriptions. ICD-10, International Statistical Classification of Diseases and Related Health Problems, 10<sup>th</sup> revision

| Chapter | Code range | Description                                                                                         | Short description                 |
|---------|------------|-----------------------------------------------------------------------------------------------------|-----------------------------------|
| 1       | A00-B99    | Certain infectious and parasitic diseases                                                           | Infectious, parasitic             |
| 2       | C00-D49    | Neoplasms                                                                                           | Neoplasms                         |
| 3       | D50-D89    | Diseases of the blood and blood-forming organs and certain disorders involving the immune mechanism | Blood, blood-forming organs       |
| 4       | E00-E89    | Endocrine, nutritional and metabolic diseases                                                       | Endocrine, nutritional, metabolic |
| 5       | F01-F99    | Mental, Behavioral and Neurodevelopmental disorders                                                 | Mental, behavioral                |
| 6       | G00-G99    | Diseases of the nervous system                                                                      | Nervous system                    |
| 7       | H00-H59    | Diseases of the eye and adnexa                                                                      | Eye, adnexa                       |
| 8       | H60-H95    | Diseases of the ear and mastoid process                                                             | Ear, mastoid                      |
| 9       | I00-I99    | Diseases of the circulatory system                                                                  | Circulatory system                |
| 10      | J00-J99    | Diseases of the respiratory system                                                                  | Respiratory system                |
| 11      | K00-K95    | Diseases of the digestive system                                                                    | Digestive system                  |
| 12      | L00-L99    | Diseases of the skin and subcutaneous tissue                                                        | Skin, subcutaneous tissue         |
| 13      | M00-M99    | Diseases of the musculoskeletal system and connective tissue                                        | Musculoskeletal, connective       |
| 14      | N00-N99    | Diseases of the genitourinary system                                                                | Genitourinary system              |
| 15      | O00-O9A    | Pregnancy, childbirth and the puerperium                                                            | Pregnancy, childbirth             |
| 16      | P00-P96    | Certain conditions originating in the perinatal period                                              | Perinatal                         |
| 17      | Q00-Q99    | Congenital malformations, deformations and chromosomal abnormalities                                | Congenital                        |
| 18      | R00-R99    | Symptoms, signs and abnormal clinical and laboratory findings, not elsewhere classified             | Not elsewhere classified          |
| 19      | S00-T88    | Injury, poisoning and certain other consequences of external causes                                 | Injury, poisoning                 |
| 20      | V00-Y99    | External causes of morbidity                                                                        | External causes                   |
| 21      | Z00-Z99    | Factors influencing health status and contact with health services                                  | Factors infl. health status       |
| 22      | U00-U99    | Codes for special purposes                                                                          | Special purposes                  |

Appendix Table S2: ICD-10 diagnosis codes for potentially avoidable causes of emergency admissions. ICD-10, International Statistical Classification of Diseases and Related Health Problems, 10<sup>th</sup> revision

| Description                                       | Code range                                                                                                                                                                            |
|---------------------------------------------------|---------------------------------------------------------------------------------------------------------------------------------------------------------------------------------------|
| Acute lower respiratory tract infections (LRTI)   | J20-J22                                                                                                                                                                               |
| Chronic lower respiratory tract infections (LRTI) | J40-J44                                                                                                                                                                               |
| Pressure sores                                    | L89                                                                                                                                                                                   |
| Diabetes                                          | E10-E14                                                                                                                                                                               |
| Food and drink issues                             | R63 (63.0, 63.1, 63.2, 63.3, 63.4, 63.6 and 63.8)                                                                                                                                     |
| Food and liquid pneumonitis                       | J69                                                                                                                                                                                   |
| Fractures and sprains                             | S02, S03, S08, S12, S13, S18, S22, S23, S28, S32, S33, S38, S42, S43, S48, S52, S53, S58, S62, S63, S68, S72, S73, S78, S82, S83, S88, S92, S93, S98, T02, T03, T05, T08, T10 and T12 |
| Intestinal infections                             | A02-A09                                                                                                                                                                               |
| Pneumonia                                         | J12-J18                                                                                                                                                                               |
| Urinary tract infections (UTI)                    | N390                                                                                                                                                                                  |

Appendix Table S3: Comparison of baseline characteristics of the cohorts of residential care home and nursing home residents in January 2019 and January 2020

| Care home type                  | Residential   |               | Nursing       |               |
|---------------------------------|---------------|---------------|---------------|---------------|
|                                 | 2019          | 2020          | 2019          | 2020          |
| N                               | 139925        | 141891        | 112507        | 115952        |
| Female (%)                      | 90956 (65.0)  | 92018 (64.9)  | 73223 (65.1)  | 74862 (64.6)  |
| Age in years*                   | 77 (19)       | 77 (19)       | 81 (14)       | 81 (14)       |
| Aged >= 65 years (%)            | 109321 (78.1) | 111809 (78.8) | 100371 (89.2) | 103762 (89.5) |
| Charlson Comorbidity Index*     | 1.39 (1.71)   | 1.45 (1.75)   | 1.79 (1.87)   | 1.89 (1.94)   |
| Dementia (%)                    | 54306 (38.8)  | 56509 (39.8)  | 51803 (46.0)  | 54162 (46.7)  |
| Follow-up in days*              | 150 (33)      | 150 (32)      | 145 (38)      | 142 (40)      |
| Reason for follow-up ending (%) |               |               |               |               |
| End of care home flag           | 6888 (4.9)    | 3822 (2.7)    | 5394 (4.8)    | 2828 (2.4)    |
| Death                           | 15431 (11.0)  | 19232 (13.6)  | 18679 (16.6)  | 28080 (24.2)  |
| End of study                    | 117606 (84.0) | 118837 (83.8) | 88434 (78.6)  | 85044 (73.3)  |
| IMD quintile† (%)               |               |               |               |               |
| 1 (least deprived)              | 25129 (18.0)  | 25590 (18.0)  | 21710 (19.3)  | 22661 (19.5)  |
| 2                               | 29691 (21.2)  | 30434 (21.4)  | 21486 (19.1)  | 21910 (18.9)  |
| 3                               | 32209 (23.0)  | 32386 (22.8)  | 23554 (20.9)  | 24402 (21.0)  |
| 4                               | 29013 (20.7)  | 29503 (20.8)  | 24012 (21.3)  | 24106 (20.8)  |
| 5 (most deprived)               | 23479 (16.8)  | 23693 (16.7)  | 21392 (19.0)  | 22625 (19.5)  |
| Missing                         | 404 (0.3)     | 285 (0.2)     | 353 (0.3)     | 248 (0.2)     |
| Region (%)                      |               |               |               |               |
| East Midlands                   | 14409 (10.3)  | 14814 (10.4)  | 10079 (9.0)   | 10055 (8.7)   |
| East of England                 | 19887 (14.2)  | 19991 (14.1)  | 10271 (9.1)   | 10470 (9.0)   |
| London                          | 9723 (6.9)    | 9472 (6.7)    | 11110 (9.9)   | 11459 (9.9)   |
| North East                      | 6963 (5.0)    | 7016 (4.9)    | 7426 (6.6)    | 7878 (6.8)    |
| North West                      | 17511 (12.5)  | 17899 (12.6)  | 15684 (13.9)  | 16042 (13.8)  |
| South East                      | 24408 (17.4)  | 24494 (17.3)  | 22243 (19.8)  | 23492 (20.3)  |
| South West                      | 17661 (12.6)  | 18145 (12.8)  | 13623 (12.1)  | 14009 (12.1)  |
| West Midlands                   | 14395 (10.3)  | 14832 (10.5)  | 11933 (10.6)  | 12566 (10.8)  |
| Yorkshire and the Humber        | 14564 (10.4)  | 14943 (10.5)  | 9785 (8.7)    | 9733 (8.4)    |
| Missing                         | 404 (0.3)     | 285 (0.2)     | 353 (0.3)     | 248 (0.2)     |
| Bed capacity*                   | 34 (21)       | 35 (21)       | 60 (27)       | 60 (26)       |

\*Mean (standard deviation),

†Index of Multiple Deprivation quintiles.

Appendix Table S4: Number and percentage of COVID-19 hospital admissions with additional diagnosis codes for acute coronary syndromes or stroke (1 March to 31 May 2020), by care home type

| Care home type | Acute coronary syndromes |     | Stroke |     |
|----------------|--------------------------|-----|--------|-----|
|                | N                        | %   | N      | %   |
| Residential    | 35                       | 1.2 | 18     | 0.6 |
| Nursing        | 49                       | 1.5 | 12     | 0.4 |

Appendix Table S5: Number of emergency admissions and emergency admission rates between 1 March and 31 May in 2019 and 2020, by care home type and ICD-10 chapter of the primary diagnosis code. ICD-10, International Statistical Classification of Diseases and Related Health Problems, 10<sup>th</sup> revision

| Care home type        |                                   | Residential |       |             | Nursing |       |             |
|-----------------------|-----------------------------------|-------------|-------|-------------|---------|-------|-------------|
|                       |                                   | 2019        | 2020  | Change (%)  | 2019    | 2020  | Change (%)  |
| <b>ICD-10 chapter</b> |                                   |             |       |             |         |       |             |
| 1                     | Infectious, parasitic             |             |       |             |         |       |             |
|                       | N                                 | 1523        | 754   | -769 (-50)  | 1433    | 738   | -695 (-48)  |
|                       | Rate*                             | 4.76        | 2.32  | -2.44 (-51) | 5.78    | 2.95  | -2.83 (-49) |
| 3                     | Blood, blood-forming organs       |             |       |             |         |       |             |
|                       | N                                 | 183         | 93    | -90 (-49)   | 157     | 74    | -83 (-53)   |
|                       | Rate*                             | 0.57        | 0.29  | -0.29 (-50) | 0.63    | 0.3   | -0.34 (-53) |
| 2                     | Neoplasms                         |             |       |             |         |       |             |
|                       | N                                 | 140         | 72    | -68 (-49)   | 88      | 60    | -28 (-32)   |
|                       | Rate*                             | 0.44        | 0.22  | -0.22 (-49) | 0.36    | 0.24  | -0.12 (-32) |
| 10                    | Respiratory system                |             |       |             |         |       |             |
|                       | N                                 | 4603        | 2588  | -2015 (-44) | 4140    | 2361  | -1779 (-43) |
|                       | Rate*                             | 14.39       | 7.96  | -6.43 (-45) | 16.69   | 9.45  | -7.25 (-43) |
| 14                    | Genitourinary system              |             |       |             |         |       |             |
|                       | N                                 | 1740        | 986   | -754 (-43)  | 1271    | 717   | -554 (-44)  |
|                       | Rate*                             | 5.44        | 3.03  | -2.41 (-44) | 5.13    | 2.87  | -2.26 (-44) |
| 5                     | Mental, behavioural               |             |       |             |         |       |             |
|                       | N                                 | 625         | 354   | -271 (-43)  | 328     | 206   | -122 (-37)  |
|                       | Rate*                             | 1.95        | 1.09  | -0.87 (-44) | 1.32    | 0.82  | -0.5 (-38)  |
| 12                    | Skin, subcutaneous tissue         |             |       |             |         |       |             |
|                       | N                                 | 640         | 369   | -271 (-42)  | 318     | 188   | -130 (-41)  |
|                       | Rate*                             | 2.00        | 1.14  | -0.87 (-43) | 1.28    | 0.75  | -0.53 (-41) |
| 18                    | Not elsewhere classified          |             |       |             |         |       |             |
|                       | N                                 | 3012        | 1934  | -1078 (-36) | 1816    | 1069  | -747 (-41)  |
|                       | Rate*                             | 9.42        | 5.95  | -3.47 (-37) | 7.32    | 4.28  | -3.05 (-42) |
| 11                    | Digestive system                  |             |       |             |         |       |             |
|                       | N                                 | 1339        | 880   | -459 (-34)  | 956     | 617   | -339 (-35)  |
|                       | Rate*                             | 4.19        | 2.71  | -1.48 (-35) | 3.86    | 2.47  | -1.39 (-36) |
| 13                    | Musculoskeletal, connective       |             |       |             |         |       |             |
|                       | N                                 | 821         | 540   | -281 (-34)  | 441     | 287   | -154 (-35)  |
|                       | Rate*                             | 2.57        | 1.66  | -0.91 (-35) | 1.78    | 1.15  | -0.63 (-35) |
| 9                     | Circulatory system                |             |       |             |         |       |             |
|                       | N                                 | 1604        | 1106  | -498 (-31)  | 1036    | 633   | -403 (-39)  |
|                       | Rate*                             | 5.02        | 3.4   | -1.61 (-32) | 4.18    | 2.53  | -1.64 (-39) |
| 6                     | Nervous system                    |             |       |             |         |       |             |
|                       | N                                 | 560         | 413   | -147 (-26)  | 382     | 258   | -124 (-32)  |
|                       | Rate*                             | 1.75        | 1.27  | -0.48 (-27) | 1.54    | 1.03  | -0.51 (-33) |
| 21                    | Factors infl. health status       |             |       |             |         |       |             |
|                       | N                                 | 109         | 85    | -24 (-22)   | 67      | 54    | -13 (-19)   |
|                       | Rate*                             | 0.34        | 0.26  | -0.08 (-23) | 0.27    | 0.22  | -0.05 (-20) |
| 4                     | Endocrine, nutritional, metabolic |             |       |             |         |       |             |
|                       | N                                 | 513         | 405   | -108 (-21)  | 429     | 322   | -107 (-25)  |
|                       | Rate*                             | 1.60        | 1.25  | -0.36 (-22) | 1.73    | 1.29  | -0.44 (-26) |
| 19                    | Injury, poisoning                 |             |       |             |         |       |             |
|                       | N                                 | 3883        | 3305  | -578 (-15)  | 2419    | 1880  | -539 (-22)  |
|                       | Rate*                             | 12.14       | 10.17 | -1.97 (-16) | 9.75    | 7.52  | -2.23 (-23) |
|                       | COVID-19                          |             |       |             |         |       |             |
|                       | N                                 | 0           | 2960  | -           | 0       | 3295  | -           |
|                       | Rate*                             | 0           | 9.11  | -           | 0       | 13.18 | -           |
|                       | Other/Unknown                     |             |       |             |         |       |             |
|                       | N                                 | 207         | 198   | -9 (-4)     | 111     | 157   | +46 (+41)   |
|                       | Rate*                             | 0.65        | 0.61  | -0.04 (-6)  | 0.45    | 0.63  | +0.18 (+40) |

\*Admissions per 100 residents per year.

Admissions where the primary diagnosis code was missing or where the primary diagnosis code corresponded to a chapter that had &lt;10 admissions for at least one year in one care home type were grouped into Other/Unknown. The ICD-10 codes for suspected or confirmed COVID-19 are part of ICD-10 chapter 22. Rows are sorted by increasing % change in residential care homes.

Appendix Table S6: Number and rates of emergency hospital admissions for acute coronary syndromes or stroke between 1 March and 31 May in 2019 and 2020, by care home type

| Care home type | Acute coronary syndromes |      |             | Stroke |      |             |
|----------------|--------------------------|------|-------------|--------|------|-------------|
|                | 2019                     | 2020 | Change (%)  | 2019   | 2020 | Change (%)  |
| Residential    |                          |      |             |        |      |             |
| N              | 184                      | 106  | -78 (-42)   | 416    | 349  | -67 (-16)   |
| Rate*          | 0.58                     | 0.33 | -0.25 (-43) | 1.30   | 1.07 | -0.23 (-17) |
| Nursing        |                          |      |             |        |      |             |
| N              | 96                       | 69   | -27 (-28)   | 252    | 191  | -61 (-24)   |
| Rate*          | 0.39                     | 0.28 | -0.11 (-29) | 1.02   | 0.76 | -0.25 (-25) |

\*Admissions per 100 residents per year.

Appendix Table S7: Number and rates of potentially avoidable emergency admissions between 1 March and 31 May in 2019 and 2020, by primary admission reason and care home type. LRTI, lower respiratory tract infection

| Care home type              | Residential |      |             | Nursing |      |             |
|-----------------------------|-------------|------|-------------|---------|------|-------------|
|                             | 2019        | 2020 | Change (%)  | 2019    | 2020 | Change (%)  |
| <b>Condition</b>            |             |      |             |         |      |             |
| Pneumonia                   |             |      |             |         |      |             |
| N                           | 2354        | 1437 | -917 (-39)  | 1958    | 1214 | -744 (-38)  |
| Rate*                       | 7.36        | 4.42 | -2.94 (-40) | 7.90    | 4.86 | -3.04 (-38) |
| Fractures and sprains       |             |      |             |         |      |             |
| N                           | 1646        | 1589 | -57 (-3)    | 922     | 826  | -96 (-10)   |
| Rate*                       | 5.15        | 4.89 | -0.26 (-5)  | 3.72    | 3.31 | -0.41 (-11) |
| Urinary tract infections    |             |      |             |         |      |             |
| N                           | 1295        | 630  | -665 (-51)  | 903     | 452  | -451 (-50)  |
| Rate*                       | 4.05        | 1.94 | -2.11 (-52) | 3.64    | 1.81 | -1.83 (-50) |
| Acute LRTIs                 |             |      |             |         |      |             |
| N                           | 827         | 439  | -388 (-47)  | 587     | 343  | -244 (-42)  |
| Rate*                       | 2.59        | 1.35 | -1.23 (-48) | 2.37    | 1.37 | -1 (-42)    |
| Food and liquid pneumonitis |             |      |             |         |      |             |
| N                           | 595         | 320  | -275 (-46)  | 914     | 494  | -420 (-46)  |
| Rate*                       | 1.86        | 0.99 | -0.88 (-47) | 3.69    | 1.98 | -1.71 (-46) |
| Chronic LRTIs               |             |      |             |         |      |             |
| N                           | 516         | 248  | -268 (-52)  | 443     | 206  | -237 (-53)  |
| Rate*                       | 1.61        | 0.76 | -0.85 (-53) | 1.79    | 0.82 | -0.96 (-54) |
| Intestinal infections       |             |      |             |         |      |             |
| N                           | 229         | 100  | -129 (-56)  | 122     | 77   | -45 (-37)   |
| Rate*                       | 0.72        | 0.31 | -0.41 (-57) | 0.49    | 0.31 | -0.18 (-37) |
| Diabetes                    |             |      |             |         |      |             |
| N                           | 114         | 112  | -2 (-2)     | 142     | 109  | -33 (-23)   |
| Rate*                       | 0.36        | 0.35 | -0.01 (-3)  | 0.57    | 0.44 | -0.14 (-24) |
| Food and drink issues       |             |      |             |         |      |             |
| N                           | 52          | 26   | -26 (-50)   | 27      | 16   | -11 (-41)   |
| Rate*                       | 0.16        | 0.08 | -0.08 (-51) | 0.11    | 0.06 | -0.05 (-41) |
| Pressure sores              |             |      |             |         |      |             |
| N                           | 24          | 25   | +1 (+4)     | 34      | 18   | -16 (-47)   |
| Rate*                       | 0.08        | 0.08 | 0.002 (+3)  | 0.14    | 0.07 | -0.07 (-47) |

\*Admissions per 100 residents per year.



Appendix Table S8: Number and rates of elective admissions with cataract procedures between 1 March and 31 May in 2019 and 2020, by care home type

| Care home type | Admissions |      |            | Rate* |      |             |
|----------------|------------|------|------------|-------|------|-------------|
|                | 2019       | 2020 | Change (%) | 2019  | 2020 | Change (%)  |
| Residential    | 371        | 71   | -300 (-81) | 1.16  | 0.22 | -0.94 (-81) |
| Nursing        | 252        | 49   | -203 (-81) | 1.02  | 0.20 | -0.82 (-81) |

\*Admissions per 100 residents per year.

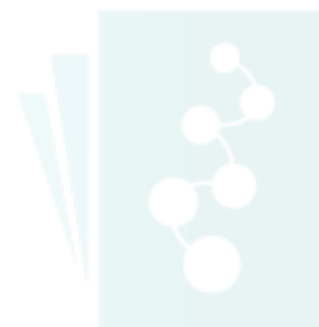

Supplementary Table: The RECORD statement – checklist of items, extended from the STROBE statement, that should be reported in observational studies using routinely collected health data

| Item No.                  | STROBE items                                                                                                                                                                               | Location in manuscript where items are reported                                                                                                                                                                                                                                                                                                                                                                                                                           | RECORD items                                                                                                                                                                                                                                                                                                                                                                                                                                        | Location in manuscript where items are reported                                                                                                                                              |
|---------------------------|--------------------------------------------------------------------------------------------------------------------------------------------------------------------------------------------|---------------------------------------------------------------------------------------------------------------------------------------------------------------------------------------------------------------------------------------------------------------------------------------------------------------------------------------------------------------------------------------------------------------------------------------------------------------------------|-----------------------------------------------------------------------------------------------------------------------------------------------------------------------------------------------------------------------------------------------------------------------------------------------------------------------------------------------------------------------------------------------------------------------------------------------------|----------------------------------------------------------------------------------------------------------------------------------------------------------------------------------------------|
| <b>Title and abstract</b> |                                                                                                                                                                                            |                                                                                                                                                                                                                                                                                                                                                                                                                                                                           |                                                                                                                                                                                                                                                                                                                                                                                                                                                     |                                                                                                                                                                                              |
| 1                         | (a) Indicate the study's design with a commonly used term in the title or the abstract (b) Provide in the abstract an informative and balanced summary of what was done and what was found |                                                                                                                                                                                                                                                                                                                                                                                                                                                                           | RECORD 1.1: The type of data used should be specified in the title or abstract. When possible, the name of the databases used should be included.<br>RECORD 1.2: If applicable, the geographic region and timeframe within which the study took place should be reported in the title or abstract.<br>RECORD 1.3: If linkage between databases was conducted for the study, this should be clearly stated in the title or abstract.                 | Title and methods section of abstract<br>Title and methods section of abstract<br>Title and methods section of abstract                                                                      |
| <b>Introduction</b>       |                                                                                                                                                                                            |                                                                                                                                                                                                                                                                                                                                                                                                                                                                           |                                                                                                                                                                                                                                                                                                                                                                                                                                                     |                                                                                                                                                                                              |
| Background rationale      | 2                                                                                                                                                                                          | Explain the scientific background and rationale for the investigation being reported                                                                                                                                                                                                                                                                                                                                                                                      |                                                                                                                                                                                                                                                                                                                                                                                                                                                     | Introduction paragraphs 1-4                                                                                                                                                                  |
| Objectives                | 3                                                                                                                                                                                          | State specific objectives, including any prespecified hypotheses                                                                                                                                                                                                                                                                                                                                                                                                          |                                                                                                                                                                                                                                                                                                                                                                                                                                                     | Introduction paragraph 4                                                                                                                                                                     |
| <b>Methods</b>            |                                                                                                                                                                                            |                                                                                                                                                                                                                                                                                                                                                                                                                                                                           |                                                                                                                                                                                                                                                                                                                                                                                                                                                     |                                                                                                                                                                                              |
| Study Design              | 4                                                                                                                                                                                          | Present key elements of study design early in the paper                                                                                                                                                                                                                                                                                                                                                                                                                   |                                                                                                                                                                                                                                                                                                                                                                                                                                                     | Study populations section, Hospital admissions section                                                                                                                                       |
| Setting                   | 5                                                                                                                                                                                          | Describe the setting, locations, and relevant dates, including periods of recruitment, exposure, follow-up, and data collection                                                                                                                                                                                                                                                                                                                                           |                                                                                                                                                                                                                                                                                                                                                                                                                                                     | Study populations section, Patient characteristics section, Hospital admissions section, Appendix Table S3                                                                                   |
| Participants              | 6                                                                                                                                                                                          | <i>(a) Cohort study</i> - Give the eligibility criteria, and the sources and methods of selection of participants. Describe methods of follow-up<br><i>Case-control study</i> - Give the eligibility criteria, and the sources and methods of case ascertainment and control selection. Give the rationale for the choice of cases and controls<br><i>Cross-sectional study</i> - Give the eligibility criteria, and the sources and methods of selection of participants | RECORD 6.1: The methods of study population selection (such as codes or algorithms used to identify subjects) should be listed in detail. If this is not possible, an explanation should be provided.<br>RECORD 6.2: Any validation studies of the codes or algorithms used to select the population should be referenced. If validation was conducted for this study and not published elsewhere, detailed methods and results should be provided. | Study population selection: Data sources section; Clinical codes in Hospital admissions section and Appendix Figure S1 and S2, Appendix Tables 1 and 2<br>References in Data sources section |

Continued

## Supplementary Table: Continued

|                              | Item No. | STROBE items                                                                                                                                                                                                                                                                                                                                                                                                                                                                                                                                                         | Location in manuscript where items are reported | RECORD items                                                                                                                                                                                                                   | Location in manuscript where items are reported                                              |
|------------------------------|----------|----------------------------------------------------------------------------------------------------------------------------------------------------------------------------------------------------------------------------------------------------------------------------------------------------------------------------------------------------------------------------------------------------------------------------------------------------------------------------------------------------------------------------------------------------------------------|-------------------------------------------------|--------------------------------------------------------------------------------------------------------------------------------------------------------------------------------------------------------------------------------|----------------------------------------------------------------------------------------------|
|                              |          | (b) <i>Cohort study</i> - For matched studies, give matching criteria and number of exposed and unexposed<br><i>Case-control study</i> - For matched studies, give matching criteria and the number of controls per case                                                                                                                                                                                                                                                                                                                                             |                                                 | RECORD 6.3: If the study involved linkage of databases, consider use of a flow diagram or other graphical display to demonstrate the data linkage process, including the number of individuals with linked data at each stage. | Appendix Figure 1                                                                            |
| Variables                    | 7        | Clearly define all outcomes, exposures, predictors, potential confounders, and effect modifiers. Give diagnostic criteria, if applicable.                                                                                                                                                                                                                                                                                                                                                                                                                            |                                                 | RECORD 7.1: A complete list of codes and algorithms used to classify exposures, outcomes, confounders, and effect modifiers should be provided. If these cannot be reported, an explanation should be provided.                | Clinical codes in Hospital admissions section, Supplementary Tables 1 and 2                  |
| Data sources/<br>measurement | 8        | For each variable of interest, give sources of data and details of methods of assessment (measurement). Describe comparability of assessment methods if there is more than one group                                                                                                                                                                                                                                                                                                                                                                                 |                                                 |                                                                                                                                                                                                                                | Patient characteristics section, Hospital admissions section, Table 1 and Appendix Figure S3 |
| Bias                         | 9        | Describe any efforts to address potential sources of bias                                                                                                                                                                                                                                                                                                                                                                                                                                                                                                            |                                                 |                                                                                                                                                                                                                                | Strengths and limitations section                                                            |
| Study size                   | 10       | Explain how the study size was arrived at                                                                                                                                                                                                                                                                                                                                                                                                                                                                                                                            |                                                 |                                                                                                                                                                                                                                | Study population section                                                                     |
| Quantitative variables       | 11       | Explain how quantitative variables were handled in the analyses. If applicable, describe which groupings were chosen, and why                                                                                                                                                                                                                                                                                                                                                                                                                                        |                                                 |                                                                                                                                                                                                                                | Hospital admissions section, Statistical analyses section                                    |
| Statistical methods          | 12       | (a) Describe all statistical methods, including those used to control for confounding<br>(b) Describe any methods used to examine subgroups and interactions<br>(c) Explain how missing data were addressed<br>(d) <i>Cohort study</i> - If applicable, explain how loss to follow-up was addressed<br><i>Case-control study</i> - If applicable, explain how matching of cases and controls was addressed<br><i>Cross-sectional study</i> - If applicable, describe analytical methods taking account of sampling strategy<br>(e) Describe any sensitivity analyses |                                                 |                                                                                                                                                                                                                                | Statistical analyses section                                                                 |



Continued

## Supplementary Table: Continued

|                                  | Item No. | STROBE items                                                                                                                                                                                                                                                                                                                  | Location in manuscript where items are reported | RECORD items                                                                                                                                                                                                                                                                                                                                                                                                                                                                          | Location in manuscript where items are reported                                               |
|----------------------------------|----------|-------------------------------------------------------------------------------------------------------------------------------------------------------------------------------------------------------------------------------------------------------------------------------------------------------------------------------|-------------------------------------------------|---------------------------------------------------------------------------------------------------------------------------------------------------------------------------------------------------------------------------------------------------------------------------------------------------------------------------------------------------------------------------------------------------------------------------------------------------------------------------------------|-----------------------------------------------------------------------------------------------|
| Data access and cleaning methods |          | ..                                                                                                                                                                                                                                                                                                                            |                                                 | RECORD 12.1: Authors should describe the extent to which the investigators had access to the database population used to create the study population.<br>RECORD 12.2: Authors should provide information on the data cleaning methods used in the study.<br>RECORD 12.3: State whether the study included person-level, institutional-level, or other data linkage across two or more databases. The methods of linkage and methods of linkage quality evaluation should be provided. | Data sources section<br>Data sources section, Hospital admissions section, Appendix Figure S1 |
| Linkage                          |          | ..                                                                                                                                                                                                                                                                                                                            |                                                 |                                                                                                                                                                                                                                                                                                                                                                                                                                                                                       | Data sources section, Strengths and Limitations section (data linkage quality and evaluation) |
| <b>Results</b>                   |          |                                                                                                                                                                                                                                                                                                                               |                                                 |                                                                                                                                                                                                                                                                                                                                                                                                                                                                                       |                                                                                               |
| Participants                     | 13       | (a) Report the numbers of individuals at each stage of the study (e.g., numbers potentially eligible, examined for eligibility, confirmed eligible, included in the study, completing follow-up, and analysed)<br>(b) Give reasons for non-participation at each stage.<br>(c) Consider use of a flow diagram                 |                                                 | RECORD 13.1: Describe in detail the selection of the persons included in the study (i.e., study population selection) including filtering based on data quality, data availability and linkage. The selection of included persons can be described in the text and/or by means of the study flow diagram.                                                                                                                                                                             | Data sources section, Study population section, Appendix Figure S1                            |
| Descriptive data                 | 14       | (a) Give characteristics of study participants (e.g., demographic, clinical, social) and information on exposures and potential confounders<br>(b) Indicate the number of participants with missing data for each variable of interest<br>(c) <i>Cohort study</i> - summarise follow-up time (e.g., average and total amount) |                                                 |                                                                                                                                                                                                                                                                                                                                                                                                                                                                                       | Appendix Table 3                                                                              |

Continued

Supplementary Table: Continued

|                   | Item No. | STROBE items                                                                                                                                                                                                                                                                                                                                                                                                                   | Location in manuscript where items are reported | RECORD items                                                                                                                                                                                                                                                                                             | Location in manuscript where items are reported             |
|-------------------|----------|--------------------------------------------------------------------------------------------------------------------------------------------------------------------------------------------------------------------------------------------------------------------------------------------------------------------------------------------------------------------------------------------------------------------------------|-------------------------------------------------|----------------------------------------------------------------------------------------------------------------------------------------------------------------------------------------------------------------------------------------------------------------------------------------------------------|-------------------------------------------------------------|
| Outcome data      | 15       | <p><i>Cohort study</i> - Report numbers of outcome events or summary measures over time</p> <p><i>Case-control study</i> - Report numbers in each exposure category, or summary measures of exposure</p> <p><i>Cross-sectional study</i> - Report numbers of outcome events or summary measures</p>                                                                                                                            |                                                 |                                                                                                                                                                                                                                                                                                          | Table 1, 2 and 3, Appendix Table S4, S5 and S6              |
| Main results      | 16       | <p>(a) Give unadjusted estimates and, if applicable, confounder-adjusted estimates and their precision (e.g., 95% confidence interval). Make clear which confounders were adjusted for and why they were included</p> <p>(b) Report category boundaries when continuous variables were categorized</p> <p>(c) If relevant, consider translating estimates of relative risk into absolute risk for a meaningful time period</p> |                                                 |                                                                                                                                                                                                                                                                                                          | N/A                                                         |
| Other analyses    | 17       | Report other analyses done—e.g., analyses of subgroups and interactions, and sensitivity analyses                                                                                                                                                                                                                                                                                                                              |                                                 |                                                                                                                                                                                                                                                                                                          | N/A                                                         |
| <b>Discussion</b> |          |                                                                                                                                                                                                                                                                                                                                                                                                                                |                                                 |                                                                                                                                                                                                                                                                                                          |                                                             |
| Key results       | 18       | Summarise key results with reference to study objectives                                                                                                                                                                                                                                                                                                                                                                       |                                                 |                                                                                                                                                                                                                                                                                                          | Principal findings section                                  |
| Limitations       | 19       | Discuss limitations of the study, taking into account sources of potential bias or imprecision. Discuss both direction and magnitude of any potential bias                                                                                                                                                                                                                                                                     |                                                 | RECORD 19.1: Discuss the implications of using data that were not created or collected to answer the specific research question(s). Include discussion of misclassification bias, unmeasured confounding, missing data, and changing eligibility over time, as they pertain to the study being reported. | Strengths and limitations section                           |
| Interpretation    | 20       | Give a cautious overall interpretation of results considering objectives, limitations, multiplicity of analyses, results from similar studies, and other relevant evidence                                                                                                                                                                                                                                                     |                                                 |                                                                                                                                                                                                                                                                                                          | Comparison with previous work section, Implications section |

Continued

## Supplementary Table: Continued

|                                                           | Item No. | STROBE items                                                                                                                                                  | Location in manuscript where items are reported | RECORD items                                                                                                                                             | Location in manuscript where items are reported                                                 |
|-----------------------------------------------------------|----------|---------------------------------------------------------------------------------------------------------------------------------------------------------------|-------------------------------------------------|----------------------------------------------------------------------------------------------------------------------------------------------------------|-------------------------------------------------------------------------------------------------|
| Generalisability                                          | 21       | Discuss the generalisability (external validity) of the study results                                                                                         |                                                 |                                                                                                                                                          | Implications section                                                                            |
| <b>Other Information</b>                                  |          |                                                                                                                                                               |                                                 |                                                                                                                                                          |                                                                                                 |
| Funding                                                   | 22       | Give the source of funding and the role of the funders for the present study and, if applicable, for the original study on which the present article is based |                                                 |                                                                                                                                                          | Funding declaration                                                                             |
| Accessibility of protocol, raw data, and programming code |          | ..                                                                                                                                                            |                                                 | RECORD 22.1: Authors should provide information on how to access any supplemental information such as the study protocol, raw data, or programming code. | Code availability in Statistical Analyses section, Availability of data and materials statement |

\*Reference: Benchimol EI, Smeeth L, Guttmann A, Harron K, Moher D, Petersen I, Sørensen HT, von Elm E, Langan SM, the RECORD Working Committee. The REporting of studies Conducted using Observational Routinely-collected health Data (RECORD) Statement. *PLoS Medicine* 2015; in press.

\*Checklist is protected under Creative Commons Attribution (CC BY) license.

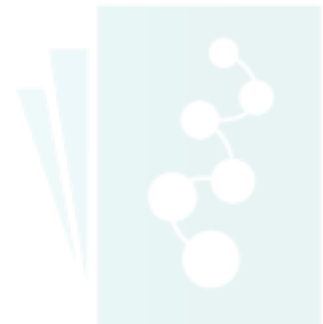

Supplement: ijpds-05-1663-s001.pdf [file ijpds-05-1663-s001.pdf]
